# Supplementary material for: Phase I Study of Oncolytic Vaccinia Virus GL-ONC1 in Patients with Peritoneal Carcinomatosis
Source: Oxford University Press journal article supplement (doi:10.1158/1078-0432.ccr-18-0244), 2018-05-17
Supplement: 10780432ccr180244-sup-195860_2_supp_4716765_p7sn9w.docx [file 10780432ccr180244-sup-195860_2_supp_4716765_p7sn9w.docx]

**Table S1. GL-ONC1 shedding analysis (patient 01).**

| **Treatment days** | **urine** | **sputum** | **anal swab** | **full blood** | **blood cells** | **blood cell lysates** |
| --- | --- | --- | --- | --- | --- | --- |
| **pre** | neg. | neg. | neg. | neg. | neg. | neg. |
| **C1D1** | neg. | neg. | neg. | neg. | neg. | neg. |
| **C1D2** | neg. | neg. | neg. | neg. | neg. | neg. |
| **C1D3** | neg. | neg. | neg. | neg. | neg. | neg. |
| **C1D5** | neg. | neg. | neg. | a | a | a |
| **C1D8** | neg. | neg. | neg. | neg. | neg. | neg. |
| **C1D9** | a | a | a | neg. | neg. | neg. |
| **C1D10** | neg. | neg. | neg. | neg. | neg. | neg. |
| **C1D11** | a | a | a | neg. | neg. | neg. |
| **C1D12** | neg. | neg. | neg. | neg. | neg. | neg. |
| **C1D13** | a | a | a | neg. | neg. | neg. |
| **C1D14** | a | a | a | neg. | neg. | neg. |
| **C1D15** | neg. | neg. | neg. | neg. | neg. | neg. |
| **C1D16** | a | a | a | neg. | neg. | neg. |
| **C1D22** | neg. | neg. | neg. | neg. | neg. | neg. |
| **C1D59** | neg. | neg. | neg. | neg. | neg. | neg. |

a, not analyzed at that time point
