# Supplementary material for: Phase I Study of Oncolytic Vaccinia Virus GL-ONC1 in Patients with Peritoneal Carcinomatosis
Source: Oxford University Press journal article supplement (doi:10.1158/1078-0432.ccr-18-0244), 2018-05-17
Supplement: 10780432ccr180244-sup-195860_2_supp_4716766_p7sn9w.docx [file 10780432ccr180244-sup-195860_2_supp_4716766_p7sn9w.docx]

**Table S2. Characterization of ascites sample contents based on cytological analyses (patient 01).**

**A**

| **% of total cells** | **C1D4** | **C1D8** | **C1D22a** | **C1D59b** |
| --- | --- | --- | --- | --- |
| Tumor cells | 5% | 1% | - | - |
| GL-ONC1-infected tumor cells | 10% | 50% | - | - |

**B**

| **% of non-neoplastic cells** | **C1D4** | **C1D8** | **C1D22a** | **C1D59b** |
| --- | --- | --- | --- | --- |
| Granulocytes | 83% | 60% | 1% | 45% |
| Lymphocytes | 10% | 35% | 90% | 45% |
| Monocytes/ Macrophages | 1% | 2% | 7% | 5% |
| Peritoneal epithelial cells | 1% | 2% | 2% | 5% |

a, peritoneal lavage

b, haemorrhagic peritoneal lavage
